# Supplementary material for: Ectopic Expression of Snail and Twist in Ph+ Leukemia Cells Upregulates CD44 Expression and Alters Their Differentiation Potential
Source: PubMed Central journal article supplement — J Cancer. 2017 Oct 23;8(19):3952–68. doi: 10.7150/jca.19633 (PMC5705997; doi:10.7150/jca.19633), 2017-10-23
Supplement: jcav08p3952s1.pdf [file jcav08p3952s1.pdf]

## Supplemental Materials

### Ectopic expression of Snail and Twist in Ph+ leukemia cells upregulate CD44 expression and alter their differentiation potential

By Noa Kidan et al., 2017

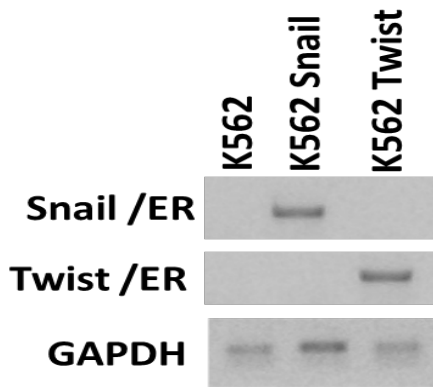

**Figure S1:** validation of K562 cells harboring Snail and Twist by RT-PCR using Snail (Table S1) and ER primers (ER reverse 5`-GTC CAG GAG CAA GTT AGG AG-3') for monitoring Snail-ER and Twist (Table S1) and ER primers for monitoring expressing of Twist-ER hybrid transcript

**Table S1: Primers used in this study:**

| Gene      | DNA Sequence                                                                       | Annealing Temperature (°C) |
|-----------|------------------------------------------------------------------------------------|----------------------------|
| CD44      | Forward 5'-AACCGCGAGAATCAAAGCCAAGGC-3'<br>Reverse 5'-GATCCACCCCAATTCCATCTGTGC-3'   | 58                         |
| β-actin   | Forward 5'-GCC CTG GACTTCGAGCAAGA-3'<br>Reverse 5'-TGC CAG GGTACATGGTGG TG-3'      | 60                         |
| γ-globin  | Forward 5'- CAT GGCAAGAAG GTGCTG AC -3'<br>Reverse 5'- GCTCTGCATCATGGG CAG TG -3'  | 60                         |
| β-catenin | Forward 5'-TGGAACATGAGATGGGTGGC-3'<br>Reverse 5'-TGCAAGTTCAGACAATACAGCTAA-3'       | 58                         |
| CXCR4     | Forward 5' AGGGGATCAGTATATACACTTCAGA-3'<br>Reverse 5'-AGGTGCAGCCTGTACTIONTGTGTC-3' | 58                         |

|               |                                                                             |           |
|---------------|-----------------------------------------------------------------------------|-----------|
|               |                                                                             |           |
| <b>GAPDH</b>  | Forward 5'-GAGTCAACGGATTTGGTCGT-3'<br>Reverse 5'-GGTGCCATGGAATTTGCCAT-3'    | <b>60</b> |
|               |                                                                             |           |
| <b>Slug</b>   | Forward 5'-TTAGAACTCACACGGGGGAGAA-3'<br>Reverse 5'-GCTACACAGCAGCCAGATTC-3'  | <b>58</b> |
|               |                                                                             |           |
| <b>Snail</b>  | Forward 5'-GCACATCCGAAGCCACACGC-3'<br>Reverse 5'-CTTGACATCTGAGTGGGTCTGG-3'  | <b>60</b> |
|               |                                                                             |           |
| <b>Twist1</b> | Forward 5'-CTGGCGGCCAGGTACATCGAC-3'<br>Reverse 5'-GGACGCGGACATGGACCAGGCC-3' | <b>60</b> |
|               |                                                                             |           |
| <b>Zeb1</b>   | Forward 5'-GTGTAAGCGCAGAAAGCAGGC-3'<br>Reverse 5'-CTTTCCTGTGTCATCCTCCAG-3'  | <b>60</b> |
|               |                                                                             |           |

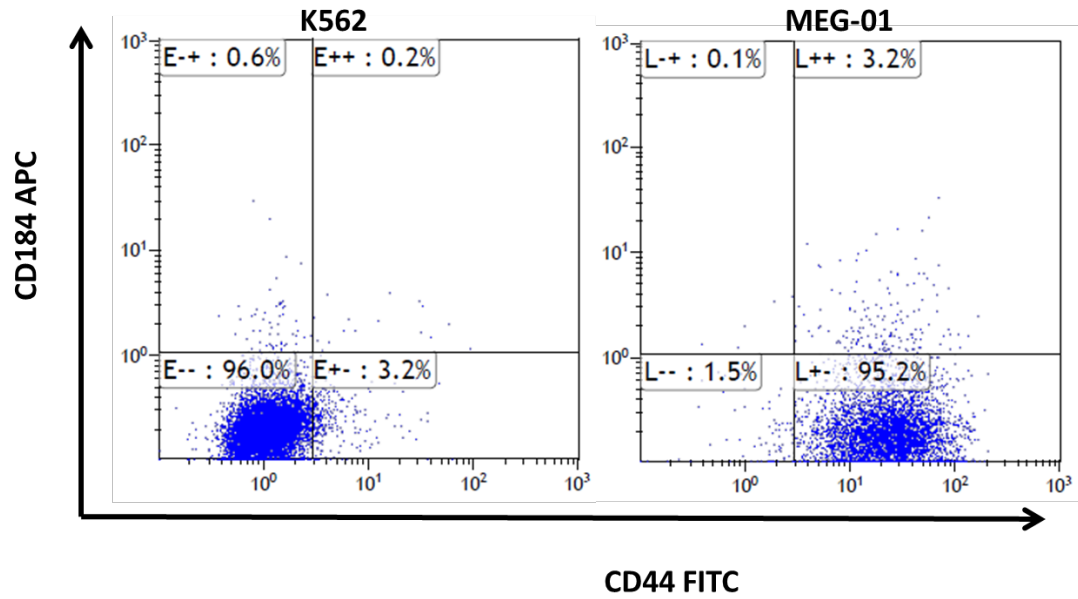

**Figure S2: Expression levels of CD44 and CD184 (CXCR4) surface proteins in K562 and MEG-01 cells.** FACS was utilized to monitor levels of CD44 and CD184 in K562 and MEG-01 cells.

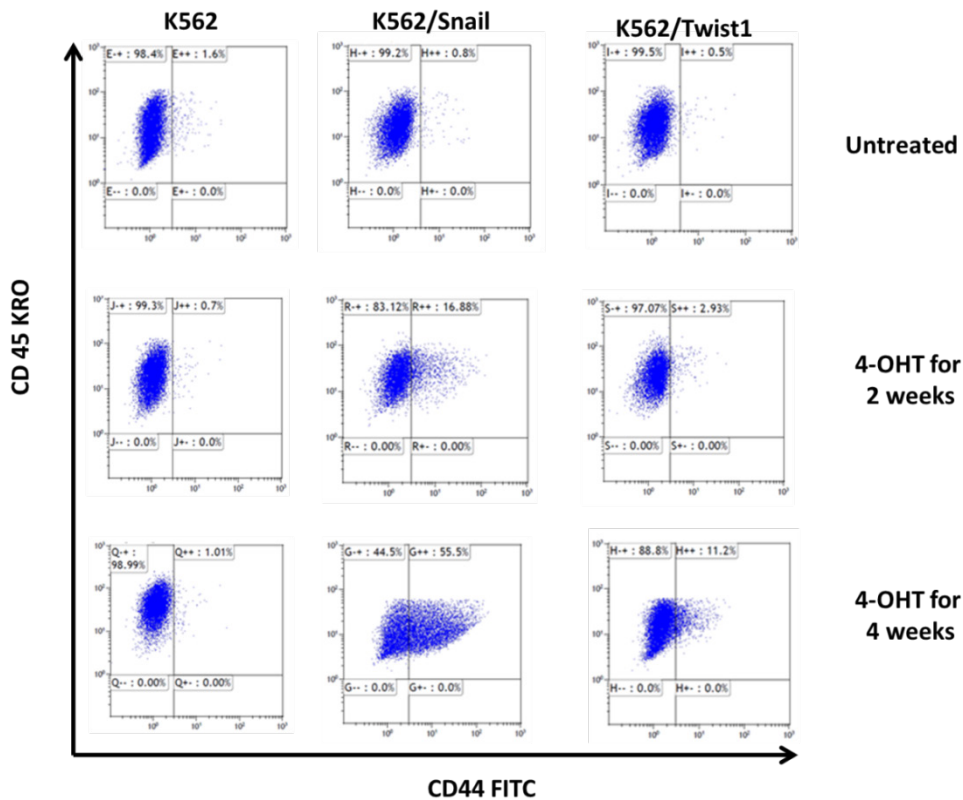

**Figure S3: Expression of CD44 in K562 cells treated with 4-OHT.** FACS analysis of CD44 expression in K562 cells treated with 4-OHT for 2 and 4 weeks.

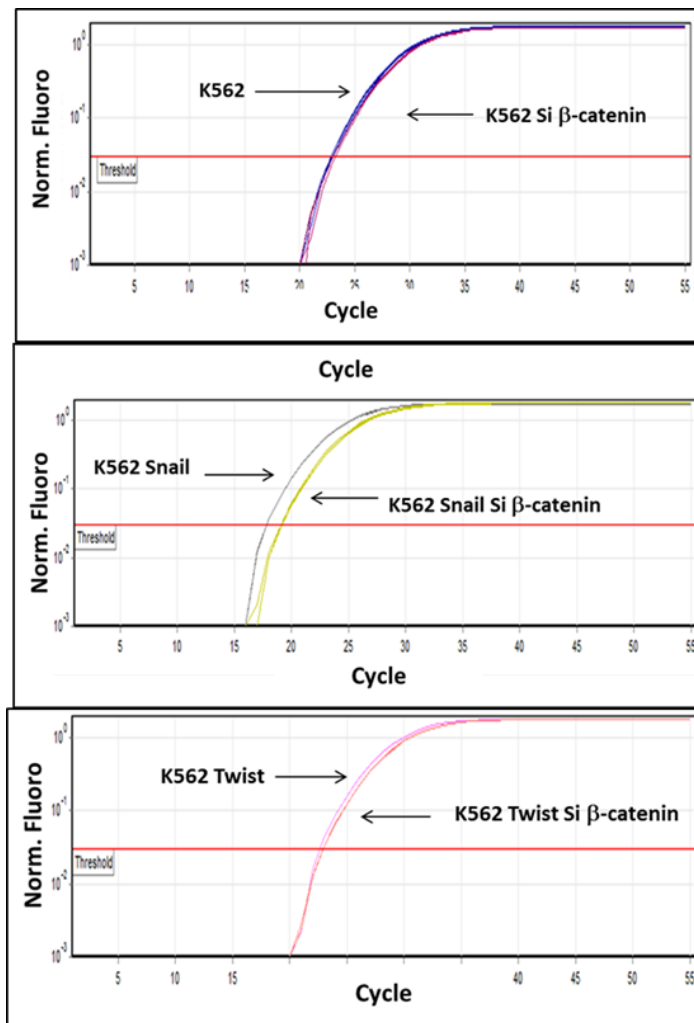

**Figure S4: Effect of  $\beta$ -catenin on Snail-dependent expression of CD44:** Real-time PCR monitoring levels of CD44 in WT K562 cells or silenced  $\beta$ -catenin.
